# Supplementary material for: Exploring interactions between Beauveria and Metarhizium strains through co-inoculation and responses of perennial ryegrass in a one-year trial
Source: PeerJ journal article supplement (doi:10.7717/peerj.12924), 2022-03-21

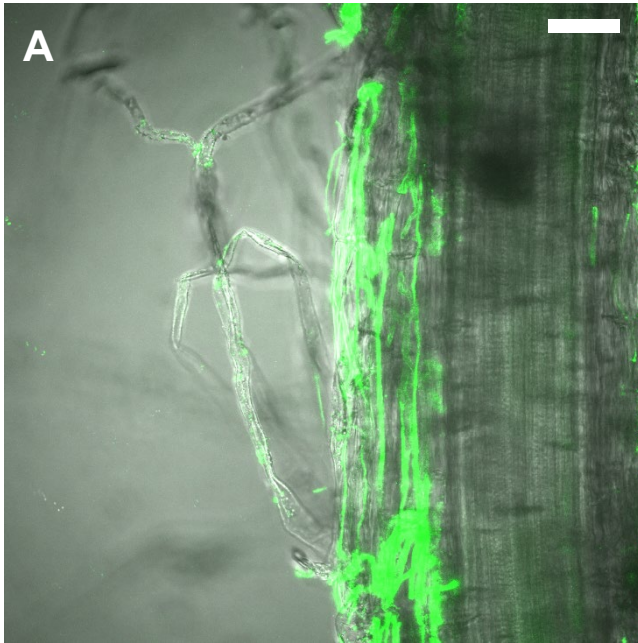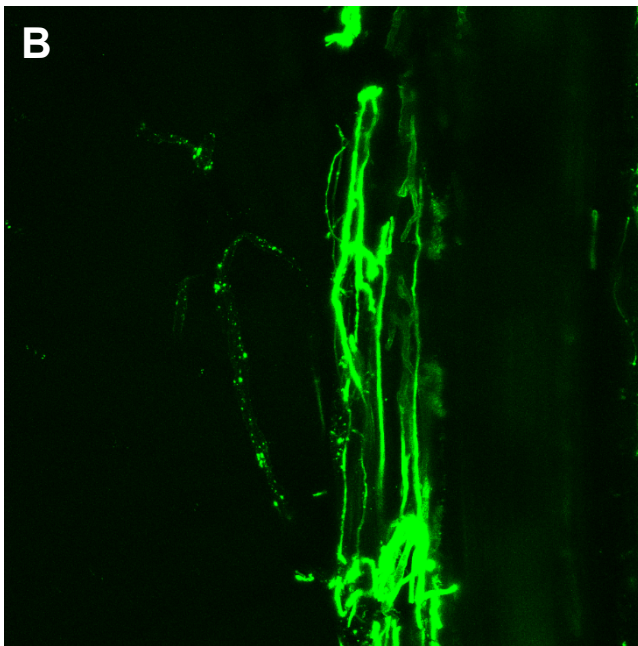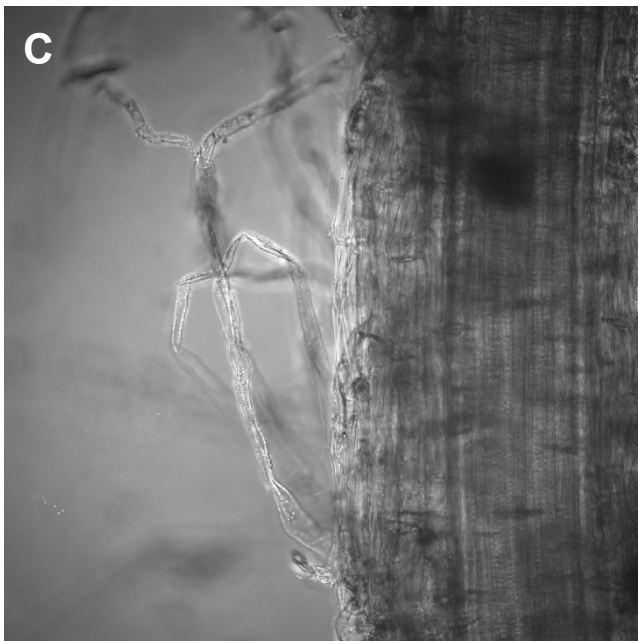

### Hyphal growth can extend into the rhizodermal cell layer

A-C: Maximum projection of z-stacks, Overlay image (A), fluorescent channel (B), bright field image (C), magnified portion of the fluorescent image (D, one z-slice). Arrow indicates growth of hyphae into the rhizodermal cell layer. Bar size: 50  $\mu\text{m}$ .

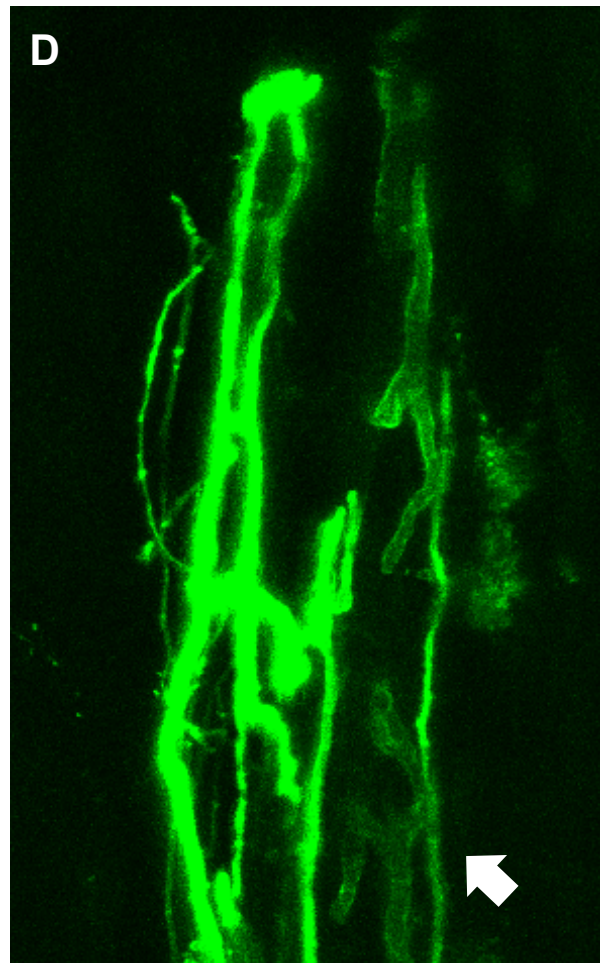

Supplement: Figure_S1.pdf [file Figure_S1.pdf]
