# Supplementary material for: Exploring interactions between Beauveria and Metarhizium strains through co-inoculation and responses of perennial ryegrass in a one-year trial
Source: PeerJ. 2022 Mar 21;10:e12924. doi: 10.7717/peerj.12924 (PMC8944343; doi:10.7717/peerj.12924)
Supplement: Supplemental Information 2 — Isolations were carried out in scaraboid larvae and the seeds and fine roots of ryegrass (Lolium perenne) from different pastures in the Los Rios region (Chile). Sampling sites for ryegrass and larvae material are indicated in Fig. 1. Taxonomic identity at the genus level for each isolate was made from morphological characteristics by using the key of von Arx (1982). In the case of Beauveria and Metarhizium strains, their identifications were corroborated by sequencing and analyzing the entire internal transcribed spacer (ITS) 1-5.8S-ITS2 ribosomal DNA region. [file peerj-10-12924-s002.xlsx]

## Sheet: Hoja1
Collection site	Material	Isolation code	Sampling date	Fungal identification	Identified as EIPFs
a	Fine roots	T05_1	2019-03-19	Fusarium sp.
a	Fine roots	T09_1	2019-03-19	Fusarium sp.
a	Fine roots	T01_1	2019-03-19	Sterile mycelia
a	Fine roots	T02_1	2019-03-19	Sterile mycelia
a	Fine roots	T02_2	2019-03-19	Sterile mycelia
a	Fine roots	T02_3	2019-03-19	Sterile mycelia
a	Fine roots	T04_1	2019-03-19	Sterile mycelia
a	Fine roots	T04_2	2019-03-19	Sterile mycelia
a	Fine roots	T04_3	2019-03-19	Sterile mycelia
a	Fine roots	T07_1	2019-03-19	Sterile mycelia
a	Fine roots	T08_1	2019-03-19	Sterile mycelia
a	Fine roots	T08_3	2019-03-19	Sterile mycelia
a	Fine roots	T08_2	2019-03-19	Penicillium sp.
a	Fine roots	T02_4	2019-03-19	Periconia sp.
a	Fine roots	T03_1	2019-03-19	Periconia sp.
a	Fine roots	T05_3	2019-03-19	Periconia sp.
a	Fine roots	T05_4	2019-03-19	Periconia sp.
a	Fine roots	T06_1	2019-03-19	Periconia sp.
a	Fine roots	T06_2	2019-03-19	Periconia sp.
a	Fine roots	T07_2	2019-03-19	Periconia sp.
a	Fine roots	T10_1	2019-03-19	Periconia sp.
a	Seeds	TM07_1	2019-04-16	Cladosporium sp.
a	Seeds	TM01_2	2019-04-16	Cladosporium sp.
a	Seeds	TM03_1	2019-04-16	Cladosporium sp.
a	Seeds	TM05_1	2019-04-16	Cladosporium sp.
a	Seeds	TM06_1	2019-04-16	Cladosporium sp.
a	Seeds	TM06_2	2019-04-16	Cladosporium sp.
a	Seeds	TM08_1	2019-04-16	Cladosporium sp.
a	Seeds	TM08_2	2019-04-16	Cladosporium sp.
a	Seeds	TM09_1	2019-04-16	Cladosporium sp.
a	Seeds	TM09_2	2019-04-16	Cladosporium sp.
a	Seeds	TM09_3	2019-04-16	Cladosporium sp.
a	Seeds	TM01_3	2019-04-16	Fusarium sp.
a	Seeds	TM02_1	2019-04-16	Fusarium sp.
a	Seeds	TM05_2	2019-04-16	Fusarium sp.
a	Seeds	TM06_3	2019-04-16	Fusarium sp.
a	Seeds	TM01_1	2019-04-16	Sterile mycelia
a	Seeds	TM03_2	2019-04-16	Sterile mycelia
a	Seeds	TM04_1	2019-04-16	Sterile mycelia
a	Seeds	TM07_2	2019-04-16	Sterile mycelia
a	Seeds	TM10_1	2019-04-16	Sterile mycelia
a	Seeds	TM08_3	2019-04-22	Aureobasidium sp.
b	Scarabaeid larvae	R02_1	2018-10-24	Clonostachys rosea	x
b	Scarabaeid larvae	R02_2	2018-10-24	Paecilomyces sp.	x
b	Scarabaeid larvae	R02_3	2018-10-24	Metarhizium sp.	x
b	Scarabaeid larvae	R02_4	2018-10-24	Fusarium sp.
b	Scarabaeid larvae	R02_5	2018-10-24	Fusarium sp.
b	Scarabaeid larvae	R08_1	2018-10-24	Paecilomyces sp.	x
b	Scarabaeid larvae	R08_2	2018-10-24	Paecilomyces sp.	x
b	Scarabaeid larvae	R10_1	2018-10-24	Paecilomyces sp.	x
b	Scarabaeid larvae	R10_2	2018-10-24	Paecilomyces sp.	x
b	Scarabaeid larvae	R11_1	2018-10-24	Paecilomyces sp.	x
b	Scarabaeid larvae	R11_2	2018-10-24	Paecilomyces sp.	x
b	Scarabaeid larvae	R12_1	2018-10-24	Paecilomyces sp.	x
b	Scarabaeid larvae	R12_2	2018-10-24	Paecilomyces sp.	x
b	Scarabaeid larvae	R13_1	2018-10-24	Aspergillus sp.
b	Scarabaeid larvae	R13_2	2018-10-24	Paecilomyces sp.	x
b	Scarabaeid larvae	R15_1	2018-10-24	Aspergillus sp.
b	Scarabaeid larvae	R15_2	2018-10-24	Aspergillus sp.
b	Scarabaeid larvae	R16_1	2018-10-24	Fusarium sp.
b	Scarabaeid larvae	R16_2	2018-10-24	Fusarium sp.
b	Scarabaeid larvae	R17_1	2018-10-24	Paecilomyces sp.	x
b	Scarabaeid larvae	R17_2	2018-10-24	Paecilomyces sp.	x
b	Scarabaeid larvae	R19_1	2018-10-24	Paecilomyces sp.	x
b	Scarabaeid larvae	R19_2	2018-10-24	Paecilomyces sp.	x
b	Scarabaeid larvae	R20_1	2018-10-24	Sterile mycelia
b	Scarabaeid larvae	R20_2	2018-10-24	Metarhizium sp.	x
b	Scarabaeid larvae	R21_1	2018-10-24	Paecilomyces sp.	x
b	Scarabaeid larvae	R21_2	2018-10-24	Paecilomyces sp.	x
b	Scarabaeid larvae	R22_1	2018-10-24	Fusarium sp.
b	Scarabaeid larvae	R22_2	2018-10-24	Fusarium sp.
b	Scarabaeid larvae	R23_1	2018-10-24	Paecilomyces sp.	x
b	Scarabaeid larvae	R23_2	2018-10-24	Aspergillus sp.
b	Scarabaeid larvae	R28_1	2018-10-24	Metarhizium sp.	x
b	Scarabaeid larvae	R28_2	2018-10-24	Metarhizium sp.	x
b	Scarabaeid larvae	R30_1	2018-10-24	Aspergillus sp.
b	Scarabaeid larvae	R30_2	2018-10-24	Paecilomyces sp.	x
b	Scarabaeid larvae	R31_1	2018-10-24	Metarhizium sp.	x
b	Scarabaeid larvae	R31_2	2018-10-24	Cordyceps confragosa	x
b	Scarabaeid larvae	R31_3	2018-10-24	Metarhizium sp.	x
b	Scarabaeid larvae	R31_4	2018-10-24	Metarhizium sp.	x
b	Scarabaeid larvae	R31_5	2018-10-24	Sterile mycelia
b	Scarabaeid larvae	R31_6_1	2018-10-24	Sterile mycelia
b	Scarabaeid larvae	R31_6_2	2018-10-24	Sterile mycelia
b	Scarabaeid larvae	R31_7	2018-10-24	Fusarium sp.
b	Fine roots	R07_3_3	2018-10-24	Ascomycota
b	Fine roots	R08_2_2	2018-10-24	Ascomycota
b	Fine roots	R02_1_1	2018-10-24	Basidiomycota
b	Fine roots	R11_1_2	2018-10-24	Basidiomycota
b	Fine roots	R11_1_4	2018-10-24	Basidiomycota
b	Fine roots	R11_3_2	2018-10-24	Basidiomycota
b	Fine roots	R11_3_3	2018-10-24	Basidiomycota
b	Fine roots	R04_3_3	2018-10-24	Chaetomium sp.
b	Fine roots	R07_1_1	2018-10-24	Cladosporium sp.
b	Fine roots	R07_3_1	2018-10-24	Cladosporium sp.
b	Fine roots	R08_2_1	2018-10-24	Cladosporium sp.
b	Fine roots	R02_1_3	2018-10-24	Fusarium sp.
b	Fine roots	R11_2_3	2018-10-24	Fusarium sp.
b	Fine roots	R01_1_2	2018-10-24	Sterile mycelia
b	Fine roots	R01_2_1	2018-10-24	Sterile mycelia
b	Fine roots	R01_2_2	2018-10-24	Sterile mycelia
b	Fine roots	R01_2_3	2018-10-24	Sterile mycelia
b	Fine roots	R02_1_2	2018-10-24	Sterile mycelia
b	Fine roots	R02_2_1	2018-10-24	Sterile mycelia
b	Fine roots	R02_2_2	2018-10-24	Sterile mycelia
b	Fine roots	R02_2_3	2018-10-24	Sterile mycelia
b	Fine roots	R02_3_1	2018-10-24	Sterile mycelia
b	Fine roots	R03_2_1	2018-10-24	Sterile mycelia
b	Fine roots	R03_3_2	2018-10-24	Sterile mycelia
b	Fine roots	R04_1_2	2018-10-24	Sterile mycelia
b	Fine roots	R04_1_3	2018-10-24	Sterile mycelia
b	Fine roots	R04_1_5	2018-10-24	Sterile mycelia
b	Fine roots	R04_2_1	2018-10-24	Sterile mycelia
b	Fine roots	R04_2_2	2018-10-24	Sterile mycelia
b	Fine roots	R04_2_3	2018-10-24	Sterile mycelia
b	Fine roots	R04_3_1	2018-10-24	Sterile mycelia
b	Fine roots	R04_3_2	2018-10-24	Sterile mycelia
b	Fine roots	R05_1_1	2018-10-24	Sterile mycelia
b	Fine roots	R05_2_2	2018-10-24	Sterile mycelia
b	Fine roots	R05_3_2	2018-10-24	Sterile mycelia
b	Fine roots	R05_3_3	2018-10-24	Sterile mycelia
b	Fine roots	R06_1_1	2018-10-24	Sterile mycelia
b	Fine roots	R06_2_1	2018-10-24	Sterile mycelia
b	Fine roots	R06_2_2	2018-10-24	Sterile mycelia
b	Fine roots	R06_2_3	2018-10-24	Sterile mycelia
b	Fine roots	R06_3_1	2018-10-24	Sterile mycelia
b	Fine roots	R07_2_1	2018-10-24	Sterile mycelia
b	Fine roots	R07_2_2	2018-10-24	Sterile mycelia
b	Fine roots	R07_2_4	2018-10-24	Sterile mycelia
b	Fine roots	R07_3_2	2018-10-24	Sterile mycelia
b	Fine roots	R07_3_4	2018-10-24	Sterile mycelia
b	Fine roots	R08_1_1	2018-10-24	Sterile mycelia
b	Fine roots	R08_1_2	2018-10-24	Sterile mycelia
b	Fine roots	R08_2_3	2018-10-24	Sterile mycelia
b	Fine roots	R08_3_1	2018-10-24	Sterile mycelia
b	Fine roots	R08_3_2	2018-10-24	Sterile mycelia
b	Fine roots	R08_3_3	2018-10-24	Sterile mycelia
b	Fine roots	R08_3_4	2018-10-24	Sterile mycelia
b	Fine roots	R09_1_1	2018-10-24	Sterile mycelia
b	Fine roots	R09_2_1	2018-10-24	Sterile mycelia
b	Fine roots	R09_2_2	2018-10-24	Sterile mycelia
b	Fine roots	R09_2_3	2018-10-24	Sterile mycelia
b	Fine roots	R09_3_2	2018-10-24	Sterile mycelia
b	Fine roots	R09_3_3	2018-10-24	Sterile mycelia
b	Fine roots	R10_2_1	2018-10-24	Sterile mycelia
b	Fine roots	R10_2_2	2018-10-24	Sterile mycelia
b	Fine roots	R10_3_2	2018-10-24	Sterile mycelia
b	Fine roots	R11_1_1	2018-10-24	Sterile mycelia
b	Fine roots	R11_2_1	2018-10-24	Sterile mycelia
b	Fine roots	R11_2_2	2018-10-24	Sterile mycelia
b	Fine roots	R24_1_1	2018-10-24	Sterile mycelia
b	Fine roots	R24_3_1	2018-10-24	Sterile mycelia
b	Fine roots	R24_3_2	2018-10-24	Sterile mycelia
b	Fine roots	R01_1_1	2018-10-24	Paecilomyces sp.	x
b	Fine roots	R01_2_4	2018-10-24	Paecilomyces sp.	x
b	Fine roots	R02_1_1	2018-10-24	Paecilomyces sp.	x
b	Fine roots	R09_3_1	2018-10-24	Paecilomyces sp.	x
b	Fine roots	R09_3_1	2018-10-24	Paecilomyces sp.	x
b	Fine roots	R10_1_2	2018-10-24	Paecilomyces sp.	x
b	Fine roots	R11_1_3	2018-10-24	Paecilomyces sp.	x
b	Fine roots	R11_3_1	2018-10-24	Paecilomyces sp.	x
b	Fine roots	R04_1_1	2018-10-24	Paecilomyces sp.	x
b	Fine roots	R07_2_3	2018-10-24	Paecilomyces sp.	x
b	Fine roots	R06_3_2	2018-10-25	Sterile mycelia
b	Seeds	RM01_1	2019-03-11	Sterile mycelia
b	Seeds	RM01_2	2019-03-11	Sterile mycelia
b	Seeds	RM01_3	2019-03-11	Sterile mycelia
b	Seeds	RM01_4	2019-03-11	Sterile mycelia
b	Seeds	RM02_1	2019-03-11	Sterile mycelia
b	Seeds	RM02_2	2019-03-11	Sterile mycelia
b	Seeds	RM02_3	2019-03-11	Sterile mycelia
b	Seeds	RM02_4	2019-03-11	Sterile mycelia
b	Seeds	RM03_1	2019-03-11	Sterile mycelia
b	Seeds	RM03_2	2019-03-11	Sterile mycelia
b	Seeds	RM03_3	2019-03-11	Sterile mycelia
b	Seeds	RM03_4	2019-03-11	Sterile mycelia
b	Seeds	RM04_1	2019-03-11	Sterile mycelia
b	Seeds	RM04_2	2019-03-11	Sterile mycelia
b	Seeds	RM04_3	2019-03-11	Sterile mycelia
b	Seeds	RM04_4	2019-03-11	Sterile mycelia
b	Seeds	RM05_1	2019-03-11	Sterile mycelia
b	Seeds	RM05_2	2019-03-11	Sterile mycelia
b	Seeds	RM05_3	2019-03-11	Sterile mycelia
b	Seeds	RM05_4	2019-03-11	Sterile mycelia
b	Seeds	RM06_1	2019-03-11	Sterile mycelia
b	Seeds	RM06_2	2019-03-11	Sterile mycelia
b	Seeds	RM06_3	2019-03-11	Sterile mycelia
b	Seeds	RM06_4	2019-03-11	Sterile mycelia
b	Seeds	RM07_1	2019-03-11	Sterile mycelia
b	Seeds	RM07_2	2019-03-11	Sterile mycelia
b	Seeds	RM07_3	2019-03-11	Sterile mycelia
b	Seeds	RM07_4	2019-03-11	Sterile mycelia
b	Seeds	RM08_1	2019-03-11	Sterile mycelia
b	Seeds	RM08_2	2019-03-11	Sterile mycelia
b	Seeds	RM08_3	2019-03-11	Sterile mycelia
b	Seeds	RM08_4	2019-03-11	Sterile mycelia
b	Seeds	RM09_1	2019-03-11	Sterile mycelia
b	Seeds	RM09_2	2019-03-11	Sterile mycelia
b	Seeds	RM09_3	2019-03-11	Sterile mycelia
b	Seeds	RM09_4	2019-03-11	Sterile mycelia
b	Seeds	RM10_1	2019-03-11	Sterile mycelia
b	Seeds	RM10_2	2019-03-11	Sterile mycelia
b	Seeds	RM10_3	2019-03-11	Sterile mycelia
b	Seeds	RM10_4	2019-03-11	Sterile mycelia
c	Fine roots	G01_3_2	2018-10-24	Helicodrendron sp.
c	Fine roots	G05_1_2	2018-10-24	Helicodrendron sp.
c	Fine roots	G01_2_1	2018-10-24	Sterile mycelia
c	Fine roots	G01_3_1	2018-10-24	Sterile mycelia
c	Fine roots	G02_2_1	2018-10-24	Sterile mycelia
c	Fine roots	G03_1_1	2018-10-24	Sterile mycelia
c	Fine roots	G03_2_3	2018-10-24	Sterile mycelia
c	Fine roots	G03_2_4	2018-10-24	Sterile mycelia
c	Fine roots	G03_3_2	2018-10-24	Sterile mycelia
c	Fine roots	G03_3_3	2018-10-24	Sterile mycelia
c	Fine roots	G03_3_4	2018-10-24	Sterile mycelia
c	Fine roots	G03_3_5	2018-10-24	Sterile mycelia
c	Fine roots	G04_3_1	2018-10-24	Sterile mycelia
c	Fine roots	G04_3_2	2018-10-24	Sterile mycelia
c	Fine roots	G05_1_1	2018-10-24	Sterile mycelia
c	Fine roots	G05_2_1	2018-10-24	Sterile mycelia
c	Fine roots	G05_2_2	2018-10-24	Sterile mycelia
c	Fine roots	G05_3_1	2018-10-24	Sterile mycelia
c	Fine roots	G05_3_2	2018-10-24	Sterile mycelia
c	Fine roots	G05_3_3	2018-10-24	Sterile mycelia
c	Fine roots	G05_3_4	2018-10-24	Sterile mycelia
c	Fine roots	G01_1_1	2018-10-24	Paecilomyces sp.	x
c	Fine roots	G02_1_1	2018-10-24	Paecilomyces sp.	x
c	Fine roots	G02_3_1	2018-10-24	Paecilomyces sp.	x
c	Fine roots	G03_2_1	2018-10-24	Paecilomyces sp.	x
c	Fine roots	G03_3_1	2018-10-24	Paecilomyces sp.	x
c	Fine roots	G02_1_2	2018-10-24	Penicillium sp.
c	Fine roots	G05_2_3	2018-10-24	Phoma sp.
c	Fine roots	G03_2_2	2018-10-24	Verticillium sp.	x
c	Seeds	GM01_1	2019-03-11	Sterile mycelia
c	Seeds	GM01_2	2019-03-11	Sterile mycelia
c	Seeds	GM01_3	2019-03-11	Sterile mycelia
c	Seeds	GM01_4	2019-03-11	Sterile mycelia
c	Seeds	GM02_1	2019-03-11	Sterile mycelia
c	Seeds	GM02_2	2019-03-11	Sterile mycelia
c	Seeds	GM02_3	2019-03-11	Sterile mycelia
c	Seeds	GM03_1	2019-03-11	Sterile mycelia
c	Seeds	GM03_2	2019-03-11	Sterile mycelia
c	Seeds	GM03_3	2019-03-11	Sterile mycelia
c	Seeds	GM03_4	2019-03-11	Sterile mycelia
c	Seeds	GM04_1	2019-03-11	Sterile mycelia
c	Seeds	GM04_2	2019-03-11	Sterile mycelia
c	Seeds	GM04_3	2019-03-11	Sterile mycelia
c	Seeds	GM04_4	2019-03-11	Sterile mycelia
c	Seeds	GM05_1	2019-03-11	Sterile mycelia
c	Seeds	GM05_2	2019-03-11	Sterile mycelia
c	Seeds	GM05_3	2019-03-11	Sterile mycelia
c	Seeds	GM05_4	2019-03-11	Sterile mycelia
c	Fine roots	G08_2	2019-03-19	Acremonium sp.	x
c	Fine roots	G06_1	2019-03-19	Sterile mycelia
c	Fine roots	G08_1	2019-03-19	Sterile mycelia
c	Fine roots	G10_1	2019-03-19	Sterile mycelia
c	Fine roots	G10_3	2019-03-19	Sterile mycelia
c	Fine roots	G07_1	2019-03-29	Acremonium sp.	x
c	Fine roots	G07_3	2019-03-29	Fusarium sp.
c	Fine roots	G07_2	2019-03-29	Sterile mycelia
c	Fine roots	G08_3	2019-04-16	Penicillium sp.
c	Seeds	GM07_1	2019-04-16	Cladosporium sp.
c	Seeds	GM08_3	2019-04-16	Cladosporium sp.
c	Seeds	GM10_1	2019-04-16	Cladosporium sp.
c	Seeds	GM09_1b	2019-04-16	Fusarium sp.
c	Seeds	GM06_1	2019-04-16	Fusarium sp.
c	Seeds	GM06_2	2019-04-16	Fusarium sp.
c	Seeds	GM09_1a	2019-04-16	Sterile mycelia
c	Seeds	GM07_2	2019-04-16	Sterile mycelia
c	Seeds	GM08_1	2019-04-16	Sterile mycelia
c	Seeds	GM08_2	2019-04-22	Fusarium sp.
d	Fine roots	SR02_2_3	2018-10-18	Basidiomycota
d	Fine roots	SR05_3_1	2018-10-18	Basidiomycota
d	Fine roots	SR05_2_1	2018-10-18	Fusarium sp.
d	Fine roots	SR01_1_1	2018-10-18	Sterile mycelia
d	Fine roots	SR01_1_2	2018-10-18	Sterile mycelia
d	Fine roots	SR01_3_1	2018-10-18	Sterile mycelia
d	Fine roots	SR02_1_1	2018-10-18	Sterile mycelia
d	Fine roots	SR02_1_2	2018-10-18	Sterile mycelia
d	Fine roots	SR02_1_3	2018-10-18	Sterile mycelia
d	Fine roots	SR02_2_1	2018-10-18	Sterile mycelia
d	Fine roots	SR02_2_2	2018-10-18	Sterile mycelia
d	Fine roots	SR02_3_1	2018-10-18	Sterile mycelia
d	Fine roots	SR02_3_2	2018-10-18	Sterile mycelia
d	Fine roots	SR03_1_1	2018-10-18	Sterile mycelia
d	Fine roots	SR03_3_1	2018-10-18	Sterile mycelia
d	Fine roots	SR04_1_1	2018-10-18	Sterile mycelia
d	Fine roots	SR04_3_2	2018-10-18	Sterile mycelia
d	Fine roots	SR04_3_3	2018-10-18	Sterile mycelia
d	Fine roots	SR05_1_1	2018-10-18	Sterile mycelia
d	Fine roots	SR03_3_2	2018-10-18	Paecilomyces sp.	x
d	Fine roots	SR04_1_3	2018-10-18	Paecilomyces sp.	x
d	Scarabaeid larvae	S01_1	2018-10-30	Paecilomyces sp.	x
d	Scarabaeid larvae	S01_2	2018-10-30	Paecilomyces sp.	x
d	Scarabaeid larvae	S01_3	2018-10-30	Metarhizium sp.	x
d	Scarabaeid larvae	S01_4	2018-10-30	Paecilomyces sp.	x
d	Scarabaeid larvae	S01_5	2018-10-30	Trichoderma sp.
d	Scarabaeid larvae	S01_6	2018-10-30	Beauveria sp.	x
d	Scarabaeid larvae	S02_1	2018-10-30	Paecilomyces sp.	x
d	Scarabaeid larvae	S02_2	2018-10-30	Paecilomyces sp.	x
d	Scarabaeid larvae	S03_1	2018-10-30	Metarhizium sp.	x
d	Scarabaeid larvae	S03_2	2018-10-30	Metarhizium sp.	x
d	Scarabaeid larvae	S03_3	2018-10-30	Trichoderma sp.
d	Scarabaeid larvae	S03_4	2018-10-30	Trichoderma sp.
d	Scarabaeid larvae	S04_1	2018-10-30	Paecilomyces sp.	x
d	Scarabaeid larvae	S04_2	2018-10-30	Paecilomyces sp.	x
d	Scarabaeid larvae	S06_1	2018-10-30	Paecilomyces sp.	x
d	Scarabaeid larvae	S08_1	2018-10-30	Fusarium sp.
d	Scarabaeid larvae	S09_1	2018-10-30	Fusarium sp.
d	Scarabaeid larvae	S09_2	2018-10-30	Fusarium sp.
d	Scarabaeid larvae	S10_1	2018-10-30	Paecilomyces sp.	x
d	Scarabaeid larvae	S10_2	2018-10-30	Paecilomyces sp.	x
d	Scarabaeid larvae	S11_1	2018-10-30	Paecilomyces sp.	x
d	Scarabaeid larvae	S11_2	2018-10-30	Paecilomyces sp.	x
d	Scarabaeid larvae	S12_1	2018-10-30	Paecilomyces sp.	x
d	Scarabaeid larvae	S12_2	2018-10-30	Paecilomyces sp.	x
d	Scarabaeid larvae	S14_1	2018-10-30	Paecilomyces sp.	x
d	Scarabaeid larvae	S14_2	2018-10-30	Paecilomyces sp.	x
d	Scarabaeid larvae	S15_1	2018-10-30	Fusarium sp.
d	Scarabaeid larvae	S15_2	2018-10-30	Fusarium sp.
d	Scarabaeid larvae	S17_1	2018-10-30	Paecilomyces sp.	x
d	Scarabaeid larvae	S17_2	2018-10-30	Paecilomyces sp.	x
d	Scarabaeid larvae	S18_1	2018-10-30	Paecilomyces sp.	x
d	Scarabaeid larvae	S18_2	2018-10-30	Paecilomyces sp.	x
d	Scarabaeid larvae	S19_1	2018-10-30	Paecilomyces sp.	x
d	Scarabaeid larvae	S19_2	2018-10-30	Paecilomyces sp.	x
d	Scarabaeid larvae	S20_1	2018-10-30	Paecilomyces sp.	x
d	Scarabaeid larvae	S20_2	2018-10-30	Paecilomyces sp.	x
d	Scarabaeid larvae	S21_1	2018-10-30	Trichoderma sp.
d	Scarabaeid larvae	S21_2	2018-10-30	Trichoderma sp.
d	Scarabaeid larvae	S22_1	2018-10-30	Paecilomyces sp.	x
d	Scarabaeid larvae	S22_2	2018-10-30	Paecilomyces sp.	x
d	Scarabaeid larvae	S25_1	2018-10-30	Paecilomyces sp.	x
d	Scarabaeid larvae	S25_2	2018-10-30	Paecilomyces sp.	x
d	Scarabaeid larvae	S26_1	2018-10-30	Metarhizium sp.	x
d	Scarabaeid larvae	S26_2	2018-10-30	Metarhizium sp.	x
d	Scarabaeid larvae	S29_1	2018-10-30	Paecilomyces sp.	x
d	Scarabaeid larvae	S29_2	2018-10-30	Paecilomyces sp.	x
d	Seeds	SRS01_1	2019-03-11	Sterile mycelia
d	Seeds	SRS01_2	2019-03-11	Sterile mycelia
d	Seeds	SRS01_3	2019-03-11	Sterile mycelia
d	Seeds	SRS01_4	2019-03-11	Sterile mycelia
d	Seeds	SRS02_1	2019-03-11	Sterile mycelia
d	Seeds	SRS02_2	2019-03-11	Sterile mycelia
d	Seeds	SRS02_3	2019-03-11	Sterile mycelia
d	Seeds	SRS02_4	2019-03-11	Sterile mycelia
d	Seeds	SRS03_1	2019-03-11	Sterile mycelia
d	Seeds	SRS03_2	2019-03-11	Sterile mycelia
d	Seeds	SRS03_3	2019-03-11	Sterile mycelia
d	Seeds	SRS03_4	2019-03-11	Sterile mycelia
d	Seeds	SRS04_1	2019-03-11	Sterile mycelia
d	Seeds	SRS04_2	2019-03-11	Sterile mycelia
d	Seeds	SRS04_3	2019-03-11	Sterile mycelia
d	Seeds	SRS04_4	2019-03-11	Sterile mycelia
d	Seeds	SRS05_1	2019-03-11	Sterile mycelia
d	Seeds	SRS05_2	2019-03-11	Sterile mycelia
d	Seeds	SRS05_3	2019-03-11	Sterile mycelia
d	Seeds	SRS05_4	2019-03-11	Sterile mycelia
d	Seeds	SRS06_1	2019-03-11	Sterile mycelia
d	Seeds	SRS07_1	2019-03-11	Sterile mycelia
d	Seeds	SRS07_2	2019-03-11	Sterile mycelia
d	Seeds	SRS07_3	2019-03-11	Sterile mycelia
d	Seeds	SRS07_4	2019-03-11	Sterile mycelia
d	Seeds	SRS08_1	2019-03-11	Sterile mycelia
d	Seeds	SRS08_2	2019-03-11	Sterile mycelia
d	Seeds	SRS08_3	2019-03-11	Sterile mycelia
d	Seeds	SRS08_4	2019-03-11	Sterile mycelia
d	Seeds	SRS09_1	2019-03-11	Sterile mycelia
d	Seeds	SRS09_2	2019-03-11	Sterile mycelia
d	Seeds	SRS09_3	2019-03-11	Sterile mycelia
d	Seeds	SRS09_4	2019-03-11	Sterile mycelia
d	Seeds	SRS10_1	2019-03-11	Sterile mycelia
d	Seeds	SRS10_2	2019-03-11	Sterile mycelia
d	Seeds	SRS10_3	2019-03-11	Sterile mycelia
d	Seeds	SRS10_4	2019-03-11	Sterile mycelia
d	Seeds	SRS06_4	2019-03-11	Sterile mycelia
d	Fine roots	SR07_1	2019-03-19	Sterile mycelia
d	Fine roots	SR08_2	2019-03-19	Sterile mycelia
d	Fine roots	SR08_3	2019-03-19	Sterile mycelia
d	Fine roots	SR09_1	2019-03-19	Sterile mycelia
d	Fine roots	SR09_2	2019-03-19	Sterile mycelia
d	Fine roots	SR09_3	2019-03-19	Sterile mycelia
d	Fine roots	SR10_1	2019-03-19	Sterile mycelia
d	Fine roots	SR07_3	2019-03-19	Paecilomyces sp.	x
d	Fine roots	SR08_1	2019-03-19	Periconia sp.
d	Fine roots	SR08_4	2019-03-19	Periconia sp.
d	Fine roots	SR06_1	2019-03-20	Periconia sp.
d	Fine roots	SR07_2	2019-04-10	Sterile mycelia
d	Seeds	SRS06_2	2019-04-16	Sterile mycelia
d	Seeds	SRS06_3	2019-04-16	Sterile mycelia
e	Scarabaeid larvae	P01_1	2018-10-31	Paecilomyces sp.	x
e	Scarabaeid larvae	P01_2	2018-10-31	Paecilomyces sp.	x
e	Scarabaeid larvae	P02_1	2018-10-31	Paecilomyces sp.	x
e	Scarabaeid larvae	P02_2	2018-10-31	Paecilomyces sp.	x
e	Scarabaeid larvae	P03_1	2018-10-31	Paecilomyces sp.	x
e	Scarabaeid larvae	P03_2	2018-10-31	Paecilomyces sp.	x
e	Scarabaeid larvae	P06_1	2018-10-31	Paecilomyces sp.	x
e	Scarabaeid larvae	P06_2	2018-10-31	Paecilomyces sp.	x
e	Scarabaeid larvae	P07_1	2018-10-31	Aspergillus sp.
e	Scarabaeid larvae	P07_2	2018-10-31	Fusarium sp.
e	Scarabaeid larvae	P09_1	2018-10-31	Paecilomyces sp.	x
e	Scarabaeid larvae	P09_2	2018-10-31	Paecilomyces sp.	x
e	Scarabaeid larvae	P11_1	2018-10-31	Paecilomyces sp.	x
e	Scarabaeid larvae	P11_2	2018-10-31	Paecilomyces sp.	x
e	Scarabaeid larvae	P12_1	2018-10-31	Paecilomyces sp.	x
e	Scarabaeid larvae	P12_2	2018-10-31	Paecilomyces sp.	x
e	Scarabaeid larvae	P13_1	2018-10-31	Paecilomyces sp.	x
e	Scarabaeid larvae	P13_2	2018-10-31	Paecilomyces sp.	x
e	Scarabaeid larvae	P14_1	2018-10-31	Paecilomyces sp.	x
e	Scarabaeid larvae	P14_2	2018-10-31	Paecilomyces sp.	x
e	Scarabaeid larvae	P15_1	2018-10-31	Paecilomyces sp.	x
e	Scarabaeid larvae	P15_2	2018-10-31	Sterile mycelia
e	Scarabaeid larvae	P15_3	2018-10-31	Sterile mycelia
e	Scarabaeid larvae	P20_1	2018-10-31	Fusarium sp.
e	Scarabaeid larvae	P22_1	2018-10-31	Paecilomyces sp.	x
e	Scarabaeid larvae	P22_2	2018-10-31	Paecilomyces sp.	x
e	Scarabaeid larvae	P24_1	2018-10-31	Paecilomyces sp.	x
e	Scarabaeid larvae	P24_2	2018-10-31	Paecilomyces sp.	x
e	Scarabaeid larvae	P25_1	2018-10-31	Paecilomyces sp.	x
e	Scarabaeid larvae	P25_2	2018-10-31	Paecilomyces sp.	x
e	Scarabaeid larvae	P26_1	2018-10-31	Fusarium sp.
e	Scarabaeid larvae	P26_2	2018-10-31	Fusarium sp.
e	Scarabaeid larvae	P28_1	2018-10-31	Paecilomyces sp.	x
e	Scarabaeid larvae	P28_2	2018-10-31	Paecilomyces sp.	x
e	Scarabaeid larvae	P29_1	2018-10-31	Metarhizium sp.	x
e	Scarabaeid larvae	P29_2	2018-10-31	Metarhizium sp.	x
e	Scarabaeid larvae	P34_1	2018-10-31	Paecilomyces sp.	x
e	Scarabaeid larvae	P34_2	2018-10-31	Paecilomyces sp.	x
e	Scarabaeid larvae	P35_1	2018-10-31	Paecilomyces sp.	x
e	Scarabaeid larvae	P35_2	2018-10-31	Paecilomyces sp.	x
e	Scarabaeid larvae	P36_1	2018-10-31	Paecilomyces sp.	x
e	Scarabaeid larvae	P36_2	2018-10-31	Paecilomyces sp.	x
e	Scarabaeid larvae	P37_1	2018-10-31	Metarhizium sp.	x
e	Scarabaeid larvae	P37_2	2018-10-31	Metarhizium sp.	x
e	Scarabaeid larvae	P38_1	2018-10-31	Metarhizium sp.	x
e	Scarabaeid larvae	P38_2	2018-10-31	Metarhizium sp.	x
e	Scarabaeid larvae	P38_3	2018-10-31	Metarhizium sp.	x
e	Scarabaeid larvae	P39_1	2018-10-31	Sterile mycelia
e	Scarabaeid larvae	P39_2	2018-10-31	Paecilomyces sp.	x
e	Scarabaeid larvae	P42_1	2018-10-31	Metarhizium sp.	x
e	Scarabaeid larvae	P42_2	2018-10-31	Metarhizium sp.	x
e	Scarabaeid larvae	P43_1	2018-10-31	Metarhizium sp.	x
e	Scarabaeid larvae	P43_2	2018-10-31	Metarhizium sp.	x
e	Scarabaeid larvae	P44_1	2018-10-31	Paecilomyces sp.	x
e	Scarabaeid larvae	P44_2	2018-10-31	Paecilomyces sp.	x
e	Scarabaeid larvae	P45_1	2018-10-31	Paecilomyces sp.	x
e	Scarabaeid larvae	P45_2	2018-10-31	Paecilomyces sp.	x
e	Scarabaeid larvae	P46_1	2018-10-31	Paecilomyces sp.	x
e	Scarabaeid larvae	P46_2	2018-10-31	Metarhizium sp.	x
e	Scarabaeid larvae	P47_1	2018-10-31	Paecilomyces sp.	x
e	Scarabaeid larvae	P47_2	2018-10-31	Paecilomyces sp.	x
e	Scarabaeid larvae	P51_1	2018-10-31	Paecilomyces sp.	x
e	Scarabaeid larvae	P51_2	2018-10-31	Metarhizium sp.	x
e	Scarabaeid larvae	P52_1	2018-10-31	Paecilomyces sp.	x
e	Scarabaeid larvae	P52_2	2018-10-31	Paecilomyces sp.	x
e	Scarabaeid larvae	P52_3	2018-10-31	Trichoderma sp.
e	Scarabaeid larvae	P53_1	2018-10-31	Paecilomyces sp.	x
e	Scarabaeid larvae	P53_2	2018-10-31	Metarhizium sp.	x
e	Scarabaeid larvae	P54_1	2018-10-31	Paecilomyces sp.	x
e	Scarabaeid larvae	P54_2	2018-10-31	Metarhizium sp.	x
e	Scarabaeid larvae	P54_3	2018-10-31	Metarhizium sp.	x
e	Scarabaeid larvae	P55_1	2018-10-31	Beauveria vermiconia	x
e	Scarabaeid larvae	P55_2	2018-10-31	Paecilomyces sp.	x
e	Scarabaeid larvae	P55_3	2018-10-31	Beauveria sp.	x
e	Scarabaeid larvae	P55_4	2018-10-31	Beauveria sp.	x
e	Scarabaeid larvae	P55_5	2018-10-31	Ulocladium sp.
e	Scarabaeid larvae	P56_1	2018-10-31	Paecilomyces sp.	x
e	Scarabaeid larvae	P56_2	2018-10-31	Paecilomyces sp.	x
e	Scarabaeid larvae	P57_1	2018-10-31	Sterile mycelia
e	Scarabaeid larvae	P57_2	2018-10-31	Paecilomyces sp.	x
e	Fine roots	P06_1	2019-03-19	Aspergillus sp.
e	Fine roots	P06_3	2019-03-19	Fusarium sp.
e	Fine roots	P01_2	2019-03-19	Sterile mycelia
e	Fine roots	P06_2	2019-03-19	Sterile mycelia
e	Fine roots	P07_1	2019-03-19	Sterile mycelia
e	Fine roots	P08_1	2019-03-19	Sterile mycelia
e	Fine roots	P08_2	2019-03-19	Sterile mycelia
e	Fine roots	P09_1	2019-03-19	Sterile mycelia
e	Fine roots	P09_2	2019-03-19	Sterile mycelia
e	Fine roots	P02_2	2019-03-19	Periconia sp.
e	Fine roots	P02_1	2019-03-20	Acremonium sp.	x
e	Fine roots	P02_4	2019-03-20	Acremonium sp.	x
e	Fine roots	P04_1	2019-03-20	Acremonium sp.	x
e	Fine roots	P01_1	2019-03-20	Sterile mycelia
e	Fine roots	P02_3	2019-03-20	Sterile mycelia
e	Fine roots	P03_1	2019-03-20	Sterile mycelia
e	Fine roots	P04_2	2019-03-20	Sterile mycelia
e	Fine roots	P04_3	2019-03-20	Sterile mycelia
e	Fine roots	P10_2	2019-03-20	Sterile mycelia
e	Fine roots	P10_3	2019-03-20	Sterile mycelia
e	Fine roots	P10_1	2019-03-20	Penicillium sp.
e	Fine roots	P03_2	2019-03-20	Periconia sp.
e	Seeds	PM04_2	2019-04-16	Cladosporium sp.
e	Seeds	PM01_1	2019-04-16	Cladosporium sp.
e	Seeds	PM02_1	2019-04-16	Cladosporium sp.
e	Seeds	PM03_1	2019-04-16	Cladosporium sp.
e	Seeds	PM03_2	2019-04-16	Cladosporium sp.
e	Seeds	PM07_1	2019-04-16	Cladosporium sp.
e	Seeds	PM07_3	2019-04-16	Cladosporium sp.
e	Seeds	PM09_1	2019-04-16	Cladosporium sp.
e	Seeds	PM10_1	2019-04-16	Cladosporium sp.
e	Seeds	PM10_2	2019-04-16	Cladosporium sp.
e	Seeds	PM02_2	2019-04-16	Fusarium sp.
e	Seeds	PM06_1	2019-04-16	Fusarium sp.
e	Seeds	PM08_2	2019-04-16	Fusarium sp.
e	Seeds	PM05_1	2019-04-16	Sterile mycelia
e	Seeds	PM06_2	2019-04-16	Sterile mycelia
e	Seeds	PM07_2	2019-04-16	Sterile mycelia
e	Seeds	PM08_1	2019-04-16	Sterile mycelia
e	Seeds	PM04_1_1	2019-04-22	Cladosporium sp.
e	Seeds	PM04_1_2	2019-04-22	Cladosporium sp.
f	Scarabaeid larvae	L01_1	2018-11-07	Paecilomyces sp.	x
f	Scarabaeid larvae	L01_2	2018-11-07	Paecilomyces sp.	x
f	Scarabaeid larvae	L02_1	2018-11-07	Sterile mycelia
f	Scarabaeid larvae	L02_2	2018-11-07	Metarhizium sp.	x
f	Scarabaeid larvae	L03_1	2018-11-07	Sterile mycelia
f	Scarabaeid larvae	L03_2	2018-11-07	Sterile mycelia
f	Scarabaeid larvae	L04_1	2018-11-07	Fusarium sp.
f	Scarabaeid larvae	L04_2	2018-11-07	Paecilomyces sp.	x
f	Scarabaeid larvae	L07_1	2018-11-07	Metarhizium sp.	x
f	Scarabaeid larvae	L07_2	2018-11-07	Metarhizium sp.	x
f	Scarabaeid larvae	L08_1	2018-11-07	Paecilomyces sp.	x
f	Scarabaeid larvae	L08_2	2018-11-07	Paecilomyces sp.	x
f	Scarabaeid larvae	L09_1	2018-11-07	Fusarium sp.
f	Scarabaeid larvae	L09_2	2018-11-07	Fusarium sp.
f	Scarabaeid larvae	L10_1	2018-11-07	Sterile mycelia
f	Scarabaeid larvae	L10_2	2018-11-07	Sterile mycelia
f	Scarabaeid larvae	L11_1	2018-11-07	Fusarium sp.
f	Scarabaeid larvae	L11_2	2018-11-07	Fusarium sp.
f	Scarabaeid larvae	L12_2	2018-11-07	Paecilomyces sp.	x
f	Scarabaeid larvae	L15_1	2018-11-07	Sterile mycelia
f	Scarabaeid larvae	L15_2	2018-11-07	Sterile mycelia
f	Scarabaeid larvae	L16_1	2018-11-07	Paecilomyces sp.	x
f	Scarabaeid larvae	L16_2	2018-11-07	Paecilomyces sp.	x
f	Scarabaeid larvae	L17_1	2018-11-07	Purpureocillium lilacinum	x
f	Scarabaeid larvae	L17_2	2018-11-07	Sterile mycelia
f	Scarabaeid larvae	L18_1	2018-11-07	Sterile mycelia
f	Scarabaeid larvae	L18_2	2018-11-07	Paecilomyces sp.	x
f	Scarabaeid larvae	L19_1	2018-11-07	Sterile mycelia
f	Scarabaeid larvae	L19_2	2018-11-07	Sterile mycelia
f	Scarabaeid larvae	L21_1	2018-11-07	Aspergillus sp.
f	Scarabaeid larvae	L21_2	2018-11-07	Aspergillus sp.
f	Scarabaeid larvae	L22_1	2018-11-07	Paecilomyces sp.	x
f	Scarabaeid larvae	L22_2	2018-11-07	Paecilomyces sp.	x
f	Scarabaeid larvae	L23_1	2018-11-07	Paecilomyces sp.	x
f	Scarabaeid larvae	L23_2	2018-11-07	Paecilomyces sp.	x
f	Scarabaeid larvae	L28_1	2018-11-07	Paecilomyces sp.	x
f	Scarabaeid larvae	L28_2	2018-11-07	Paecilomyces sp.	x
f	Scarabaeid larvae	L29_1	2018-11-07	Paecilomyces sp.	x
f	Scarabaeid larvae	L29_2	2018-11-07	Paecilomyces sp.	x
f	Scarabaeid larvae	L30_1	2018-11-07	Sterile mycelia
f	Scarabaeid larvae	L30_2	2018-11-07	Sterile mycelia
f	Fine roots	L04_1	2019-03-29	Fusarium sp.
f	Fine roots	L02_2	2019-03-29	Sterile mycelia
f	Fine roots	L03_1	2019-03-29	Sterile mycelia
f	Fine roots	L05_1	2019-03-29	Sterile mycelia
f	Fine roots	L05_2	2019-03-29	Sterile mycelia
f	Fine roots	L06_3	2019-03-29	Sterile mycelia
f	Fine roots	L07_2	2019-03-29	Sterile mycelia
f	Fine roots	L08_2	2019-03-29	Sterile mycelia
f	Fine roots	L09_1	2019-03-29	Sterile mycelia
f	Fine roots	L06_1	2019-03-29	Paecilomyces sp.	x
f	Fine roots	L08_1	2019-03-29	Paecilomyces sp.	x
f	Fine roots	L04_2	2019-04-03	Sterile mycelia
f	Fine roots	L10_4	2019-04-03	Sterile mycelia
f	Fine roots	L03_2	2019-04-04	Acremonium sp.	x
f	Fine roots	L03_3	2019-04-04	Sterile mycelia
f	Fine roots	L02_1_2	2019-04-09	Sterile mycelia
f	Fine roots	L02_1_1	2019-04-09	Penicillium sp.
f	Seeds	LM02_1	2019-04-16	Fusarium sp.
f	Seeds	LM02_3	2019-04-16	Fusarium sp.
f	Seeds	LM04_1	2019-04-16	Fusarium sp.
f	Seeds	LM07_1	2019-04-16	Fusarium sp.
f	Seeds	LM07_2	2019-04-16	Fusarium sp.
f	Seeds	LM08_1	2019-04-16	Fusarium sp.
f	Seeds	LM09_1	2019-04-16	Fusarium sp.
f	Seeds	LM10_1	2019-04-16	Fusarium sp.
f	Seeds	LM01_1	2019-04-16	Sterile mycelia
f	Seeds	LM02_2	2019-04-16	Sterile mycelia
f	Seeds	LM03_1	2019-04-16	Sterile mycelia
f	Seeds	LM04_2	2019-04-16	Sterile mycelia
f	Seeds	LM05_2	2019-04-16	Sterile mycelia
f	Seeds	LM06_1	2019-04-16	Sterile mycelia
f	Seeds	LM06_2	2019-04-16	Sterile mycelia
f	Seeds	LM10_2	2019-04-16	Sterile mycelia
g	Fine roots	J01_3	2019-03-29	Fusarium sp.
g	Fine roots	J03_1	2019-03-29	Fusarium sp.
g	Fine roots	J05_1	2019-03-29	Fusarium sp.
g	Fine roots	J08_1	2019-03-29	Fusarium sp.
g	Fine roots	J09_1	2019-03-29	Fusarium sp.
g	Fine roots	J01_1	2019-03-29	Sterile mycelia
g	Fine roots	J01_2	2019-03-29	Sterile mycelia
g	Fine roots	J02_1	2019-03-29	Sterile mycelia
g	Fine roots	J04_1	2019-03-29	Sterile mycelia
g	Fine roots	J06_1	2019-03-29	Sterile mycelia
g	Fine roots	J08_2	2019-03-29	Sterile mycelia
g	Fine roots	J10_2	2019-03-29	Sterile mycelia
g	Fine roots	J10_1	2019-03-29	Penicillium sp.
g	Fine roots	J01_4	2019-04-04	Fusarium sp.
g	Fine roots	J07_1	2019-04-10	Fusarium sp.
g	Seeds	JM01_1	2019-04-16	Fusarium sp.
g	Seeds	JM02_2	2019-04-16	Fusarium sp.
g	Seeds	JM03_2	2019-04-16	Fusarium sp.
g	Seeds	JM06_1	2019-04-16	Fusarium sp.
g	Seeds	JM06_2	2019-04-16	Fusarium sp.
g	Seeds	JM08_1	2019-04-16	Fusarium sp.
g	Seeds	JM03_1	2019-04-16	Sterile mycelia
g	Seeds	JM04_2	2019-04-16	Sterile mycelia
g	Seeds	JM06_3	2019-04-16	Sterile mycelia
g	Seeds	JM07_1	2019-04-16	Sterile mycelia
g	Seeds	JM09_2	2019-04-16	Sterile mycelia
g	Seeds	JM10_1	2019-04-16	Sterile mycelia
g	Seeds	JM10_2	2019-04-16	Sterile mycelia
g	Seeds	JM09_1_1	2019-04-22	Cladosporium sp.
g	Seeds	JM09_1_2	2019-04-22	Cladosporium sp.
g	Seeds	JM02_1_1	2019-04-22	Fusarium sp.
g	Seeds	JM02_1_2	2019-04-22	Fusarium sp.
g	Seeds	JM04_1_1	2019-04-22	Fusarium sp.
g	Seeds	JM04_1_2	2019-04-22	Fusarium sp.
g	Seeds	JM08_2_1	2019-04-22	Fusarium sp.
g	Seeds	JM08_2_2	2019-04-22	Fusarium sp.
h	Scarabaeid larvae	M02_1	2018-11-07	Paecilomyces sp.	x
h	Scarabaeid larvae	M02_2	2018-11-07	Paecilomyces sp.	x
h	Scarabaeid larvae	M03_1	2018-11-07	Fusarium sp.
h	Scarabaeid larvae	M03_2	2018-11-07	Penicillium
h	Scarabaeid larvae	M04_1	2018-11-07	Yeast
h	Scarabaeid larvae	M04_2	2018-11-07	Yeast
h	Scarabaeid larvae	M05_1	2018-11-07	Paecilomyces sp.	x
h	Scarabaeid larvae	M05_2	2018-11-07	Paecilomyces sp.	x
h	Scarabaeid larvae	M07_1	2018-11-07	Paecilomyces sp.	x
h	Scarabaeid larvae	M07_2	2018-11-07	Paecilomyces sp.	x
h	Scarabaeid larvae	M08_1	2018-11-07	Paecilomyces sp.	x
h	Scarabaeid larvae	M08_2	2018-11-07	Paecilomyces sp.	x
h	Scarabaeid larvae	M10_1	2018-11-07	Paecilomyces sp.	x
h	Scarabaeid larvae	M10_2	2018-11-07	Paecilomyces sp.	x
h	Scarabaeid larvae	M13_1	2018-11-07	Paecilomyces sp.	x
h	Scarabaeid larvae	M13_2	2018-11-07	Paecilomyces sp.	x
h	Scarabaeid larvae	M14_1	2018-11-07	Fusarium sp.
h	Scarabaeid larvae	M14_2	2018-11-07	Fusarium sp.
h	Scarabaeid larvae	M15_1	2018-11-07	Paecilomyces sp.	x
h	Scarabaeid larvae	M15_2	2018-11-07	Paecilomyces sp.	x
h	Scarabaeid larvae	M16_1	2018-11-07	Paecilomyces sp.	x
h	Scarabaeid larvae	M16_2	2018-11-07	Paecilomyces sp.	x
h	Scarabaeid larvae	M16_3	2018-11-07	Paecilomyces sp.	x
h	Scarabaeid larvae	M17_1	2018-11-07	Fusarium sp.
h	Scarabaeid larvae	M17_2	2018-11-07	Fusarium sp.
h	Scarabaeid larvae	M18_1	2018-11-07	Paecilomyces sp.	x
h	Scarabaeid larvae	M18_2	2018-11-07	Paecilomyces sp.	x
h	Scarabaeid larvae	M20_1	2018-11-07	Paecilomyces sp.	x
h	Scarabaeid larvae	M20_2	2018-11-07	Paecilomyces sp.	x
h	Scarabaeid larvae	M23_1	2018-11-07	Paecilomyces sp.	x
h	Scarabaeid larvae	M23_2	2018-11-07	Paecilomyces sp	x
h	Scarabaeid larvae	M24_1	2018-11-07	Paecilomyces sp.	x
h	Scarabaeid larvae	M24_2	2018-11-07	Paecilomyces sp.	x
h	Scarabaeid larvae	M25_1	2018-11-07	Metarhizium sp	x
h	Scarabaeid larvae	M25_2	2018-11-07	Metarhizium sp	x
h	Scarabaeid larvae	M26_1	2018-11-07	Fusarium sp.
h	Scarabaeid larvae	M26_2	2018-11-07	Fusarium sp.
h	Scarabaeid larvae	M27_1	2018-11-07	Paecilomyces sp.	x
h	Scarabaeid larvae	M27_2	2018-11-07	Paecilomyces sp.	x
h	Scarabaeid larvae	M28_1	2018-11-07	Paecilomyces sp.	x
h	Scarabaeid larvae	M28_2	2018-11-07	Paecilomyces sp.	x
h	Scarabaeid larvae	M29_1	2018-11-07	Paecilomyces sp.	x
h	Scarabaeid larvae	M29_2	2018-11-07	Paecilomyces sp.	x
h	Fine roots	MA11_1	2018-11-07	Fusarium sp.
h	Fine roots	MA11_2	2018-11-07	Paecilomyces sp.	x
h	Fine roots	MA01_2	2019-03-29	Fusarium sp.
h	Fine roots	MA01_3	2019-03-29	Fusarium sp.
h	Fine roots	MA02_3	2019-03-29	Fusarium sp.
h	Fine roots	MA03_1	2019-03-29	Fusarium sp.
h	Fine roots	MA04_1	2019-03-29	Fusarium sp.
h	Fine roots	MA06_3	2019-03-29	Fusarium sp.
h	Fine roots	MA10_1	2019-03-29	Fusarium sp.
h	Fine roots	MA10_2	2019-03-29	Fusarium sp.
h	Fine roots	MA01_1	2019-03-29	Sterile mycelia
h	Fine roots	MA02_1	2019-03-29	Sterile mycelia
h	Fine roots	MA02_2	2019-03-29	Sterile mycelia
h	Fine roots	MA03_2	2019-03-29	Sterile mycelia
h	Fine roots	MA05_1	2019-03-29	Sterile mycelia
h	Fine roots	MA05_2	2019-03-29	Sterile mycelia
h	Fine roots	MA06_1	2019-03-29	Sterile mycelia
h	Fine roots	MA06_2	2019-03-29	Sterile mycelia
h	Fine roots	MA09_2	2019-03-29	Sterile mycelia
h	Fine roots	MA10_3	2019-03-29	Sterile mycelia
h	Fine roots	MA07_1	2019-04-10	Sterile mycelia
h	Seeds	MAM03_2	2019-04-16	Cladosporium sp.
h	Seeds	MAM01_2	2019-04-16	Fusarium sp.
h	Seeds	MAM02_1	2019-04-16	Fusarium sp.
h	Seeds	MAM02_2	2019-04-16	Fusarium sp.
h	Seeds	MAM05_2	2019-04-16	Fusarium sp.
h	Seeds	MAM07_1	2019-04-16	Fusarium sp.
h	Seeds	MAM08_2	2019-04-16	Fusarium sp.
h	Seeds	MAM01_1	2019-04-16	Sterile mycelia
h	Seeds	MAM04_2	2019-04-16	Sterile mycelia
h	Seeds	MAM05_1	2019-04-16	Sterile mycelia
h	Seeds	MAM06_1	2019-04-16	Sterile mycelia
h	Seeds	MAM06_2	2019-04-16	Sterile mycelia
h	Seeds	MAM07_2	2019-04-16	Sterile mycelia
h	Seeds	MAM08_1	2019-04-16	Sterile mycelia
h	Seeds	MAM09_1	2019-04-16	Sterile mycelia
h	Seeds	MAM10_1	2019-04-16	Sterile mycelia
h	Seeds	MAM03_1_1	2019-04-22	Fusarium sp.
h	Seeds	MAM04_1	2019-04-22	Fusarium sp.
h	Seeds	MAM03_1_2	2019-04-22	Fusarium sp.
h	Seeds	MAM10_2_1	2019-04-22	Sterile mycelia
h	Seeds	MAM10_2_2	2019-04-22	Sterile mycelia
i	Fine roots	C04_2	2019-03-29	Aspergillus sp.
i	Fine roots	C03_1	2019-03-29	Fusarium sp.
i	Fine roots	C04_1	2019-03-29	Fusarium sp.
i	Fine roots	C05_1	2019-03-29	Fusarium sp.
i	Fine roots	C08_1	2019-03-29	Fusarium sp.
i	Fine roots	C08_2	2019-03-29	Fusarium sp.
i	Fine roots	C10_1	2019-03-29	Fusarium sp.
i	Fine roots	C10_2	2019-03-29	Fusarium sp.
i	Fine roots	C01_1	2019-03-29	Sterile mycelia
i	Fine roots	C01_1	2019-03-29	Sterile mycelia
i	Fine roots	C02_1	2019-03-29	Sterile mycelia
i	Fine roots	C06_1	2019-03-29	Sterile mycelia
i	Fine roots	C06_2	2019-03-29	Sterile mycelia
i	Fine roots	C06_3	2019-03-29	Sterile mycelia
i	Fine roots	C07_1	2019-03-29	Sterile mycelia
i	Fine roots	C08_3	2019-03-29	Sterile mycelia
i	Fine roots	C09_1	2019-03-29	Sterile mycelia
i	Fine roots	C09_2	2019-03-29	Sterile mycelia
i	Fine roots	C03_2	2019-04-03	Fusarium sp.
i	Fine roots	C08_4	2019-04-03	Fusarium sp.
i	Fine roots	C02_2_2	2019-04-09	Paecilomyces sp.	x
i	Fine roots	C02_2_1	2019-04-09	Penicillium sp.
i	Seeds	CM03_1	2019-04-16	Alternaria sp.
i	Seeds	CM04_1	2019-04-16	Cladosporium sp.
i	Seeds	CM08_1	2019-04-16	Cladosporium sp.
i	Seeds	CM06_1	2019-04-16	Fusarium sp.
i	Seeds	CM06_2	2019-04-16	Fusarium sp.
i	Seeds	CM08_3	2019-04-16	Fusarium sp.
i	Seeds	CM10_1	2019-04-16	Fusarium sp.
i	Seeds	CM01_1	2019-04-16	Sterile mycelia
i	Seeds	CM02_2	2019-04-16	Sterile mycelia
i	Seeds	CM03_2	2019-04-16	Sterile mycelia
i	Seeds	CM04_2	2019-04-16	Sterile mycelia
i	Seeds	CM05_1	2019-04-16	Sterile mycelia
i	Seeds	CM07_1	2019-04-16	Sterile mycelia
i	Seeds	CM07_2	2019-04-16	Sterile mycelia
i	Seeds	CM02_1	2019-04-16	Penicillium sp.
i	Seeds	CM05_2_1	2019-04-22	Fusarium sp.
i	Seeds	CM05_2_2	2019-04-22	Fusarium sp.
i	Seeds	CM08_2_1	2019-04-22	Fusarium sp.
i	Seeds	CM08_2_2	2019-04-22	Fusarium sp.
