# Supplementary material for: Exploring interactions between Beauveria and Metarhizium strains through co-inoculation and responses of perennial ryegrass in a one-year trial
Source: PeerJ. 2022 Mar 21;10:e12924. doi: 10.7717/peerj.12924 (PMC8944343; doi:10.7717/peerj.12924)
Supplement: Supplemental Information 5 — Each of the assays was replicated twice. The plates were incubated at room temperature from 21 days. Observations were performed every 7 days, in which the mycelial radial growth of Beauveria and Metarhizium growing alone on a control plate (r1) and the ratio in a dual culture of both genera (r2) were measured and the percentage of inhibition (I%) of mycelial growth was estimated as follows: I% = [(r1-r2)/r1] × 100. The percentage of inhibition (I%) was calculated statistically via ANOVA (P ≤ 0.05). [file peerj-10-12924-s005.xlsx]

## Sheet: Hoja1
	Beauveria strains
Metarhizium strains	S01-6		P55-1
L02-2	60.6061	-24.1379	50	49.2481
L07-1	60.2564	0	53.8462	53.0075
M25-2	58.9744	-10.3448	53.8462	39.8496
P29-1	57.7273	-27.5862	55	49.2481
P37-1	50.5	-27.5862	50.5	34.2105
P38-3	57.1429	17.2414	51.7857	47.3684
P42-1	55.8442	-13.7931	61.039	53.0075
P43-1	55.2632	10.3448	56.5789	49.2481
P53-2	50.4464	-6.89655	61.1607	54.8872
P54-3	54.0541	-31.0345	56.7568	47.3684
R02-3	58.9744	-10.3448	56.4103	49.2481
R20-2	51.8349	20.6897	46.3303	28.5714
R31-3	66.6667	-37.931	51.2821	47.3684
Average	57.2536	-12.4138	55.1742	47.4937
P - value	0.224341		2.13242e-12
Inhibition porcentage of Metarhizium in dual culture
Inhibition porcentage of Beauveria in dual culture
