# Supplementary material for: Exploring interactions between Beauveria and Metarhizium strains through co-inoculation and responses of perennial ryegrass in a one-year trial
Source: PeerJ. 2022 Mar 21;10:e12924. doi: 10.7717/peerj.12924 (PMC8944343; doi:10.7717/peerj.12924)
Supplement: Supplemental Information 6 [file peerj-10-12924-s006.xlsx]

## Sheet: Hoja1
			Miner data		LOL		MET		BEA		Normalized Relative abundance		Average normalized Relative abundance
	Mini-pasture	qPCR Sample	Efficience (Eff)	Ct	Average Eff	Relative abundance	Average Eff	Relative abundance	Average Eff	Relative abundance	MET	BEA	MET	BEA
		58M	0.749255	24.9577
	T1 A	58B	0.801186	25.7002	0.757424	0.000291261	0.771475	6.34044e-07	0.802145	2.66779e-07	0.00217689	0.000915944
		58L	0.764598	14.4388
		59M	0.790746	23.6895									0.00274331	0.0021682
	T1 B	59B	0.805728	22.5504	0.757424	0.000432163	0.771475	1.30936e-06	0.802145	1.70545e-06	0.00302977	0.00394631
		59L	0.755103	13.739
		60M	0.774425	22.7743
	T1 C	60B	0.799522	23.1466	0.757424	0.000730911	0.771475	2.20975e-06	0.802145	1.20041e-06	0.00302328	0.00164234
		60L	0.752573	12.807
		61M	0.778706	24.8615
	T2 A	61B	0.823876	24.4699	0.767601	0.00068124	0.774103	6.45662e-07	0.821178	4.25805e-07	0.000947774	0.000625044
		61L	0.781226	12.8007
		62M	0.749759	25.0124									0.00174471	0.00129124
	T2 B	62B	0.817458	23.4872	0.767601	0.000455035	0.774103	5.92165e-07	0.821178	7.67436e-07	0.00130136	0.00168654
J		62L	0.756559	13.5092
		63M	0.793844	23.55
U	T2 C	63B	0.822201	23.6014	0.767601	0.000458774	0.774103	1.36943e-06	0.821178	7.16669e-07	0.00298498	0.00156214
		63L	0.747496	13.4948
N		64M	0.80229	24.1747
	T3 A	64B	0.810295	24.26	0.779708	0.000829119	0.795628	7.15137e-07	0.814224	5.29847e-07	0.000862525	0.000639048
E		64L	0.774081	12.3084
		65M	0.798674	27.5005									0.00227208	0.00138759
	T3 B	65B	0.819997	23.1888	0.779708	0.000498417	0.795628	1.02076e-07	0.814224	1.00295e-06	0.000204801	0.00201226
		65L	0.791848	13.1912
		66M	0.785919	21.4475
	T3 C	66B	0.81238	23.3193	0.779708	0.000613906	0.795628	3.52929e-06	0.814224	9.279e-07	0.00574891	0.00151147
		66L	0.773194	12.8297
		67M	0.777648	23.4687
	T4 A	67B	0.81793	22.7718	0.766196	0.000678093	0.775973	1.39979e-06	0.811346	1.33302e-06	0.00206431	0.00196583
		67L	0.760576	12.8268
		68M	0.786281	23.9286									0.00124783	0.00178654
	T4 B	68B	0.809731	22.4665	0.766196	0.00111587	0.775973	1.07485e-06	0.811346	1.59813e-06	0.000963242	0.00143218
		68L	0.782188	11.9511
		69M	0.763988	25.3006
	T4 C	69B	0.806377	22.764	0.766196	0.000682724	0.775973	4.88789e-07	0.811346	1.33923e-06	0.000715939	0.0019616
		69L	0.755825	12.8148
		82M	0.775105	23.2161
	T1 A	82B	0.825327	22.8932	0.784395	0.00123781	0.781038	1.5148e-06	0.819665	1.11679e-06	0.00122377	0.000902225
		82L	0.769268	11.5604
		83M	0.778223	23.1097									0.00130236	0.000722813
	T1 B	83B	0.831237	23.0336	0.784395	0.00101744	0.781038	1.61072e-06	0.819665	1.02676e-06	0.00158311	0.00100916
		83L	0.788746	11.899
		84M	0.789786	23.9258
	T1 C	84B	0.802433	25.497	0.784395	0.000914059	0.781038	1.00565e-06	0.819665	2.34966e-07	0.0011002	0.000257057
		84L	0.795171	12.084
		85M	0.77535	22.9142
A	T2 A	85B	0.808371	21.4751	0.765295	0.00130953	0.777263	1.89295e-06	0.819719	2.60849e-06	0.00144551	0.00199192
		85L	0.75966	11.6802
U		86M	0.77317	23.3709									0.00118319	0.00180809
	T2 B	86B	0.82191	21.5443	0.765295	0.00166604	0.777263	1.45572e-06	0.819719	2.50263e-06	0.000873759	0.00150215
G		86L	0.748593	11.2566
		87M	0.78327	23.4985
U	T2 C	87B	0.828876	21.8196	0.765295	0.0010995	0.777263	1.35272e-06	0.819719	2.12227e-06	0.0012303	0.00193021
		87L	0.787631	11.9878
S		88M	0.799798	23.6897
	T3 A	88B	0.814116	24.5288	0.768706	0.00132793	0.771593	1.3072e-06	0.804596	5.14415e-07	0.000984393	0.000387382
T		88L	0.790011	11.6162
		89M	0.750278	25.4691									0.00045448	0.00059739
	T3 B	89B	0.816133	22.6565	0.768706	0.00148101	0.771593	4.72502e-07	0.804596	1.55352e-06	0.00031904	0.00104896
		89L	0.743572	11.4249
		90M	0.764701	29.0382
	T3 C	90B	0.78354	25.115	0.768706	0.00102274	0.771593	6.13706e-08	0.804596	3.63921e-07	6.00061e-05	0.00035583
		90L	0.772535	12.0742
		91M	0.808021	27.6277
	T4 A	91B	0.8233	22.4917	0.765846	0.00123738	0.788606	1.05587e-07	0.818727	1.43673e-06	8.53313e-05	0.00116111
		91L	0.779097	11.7735
		92M	0.75497	25.1578									0.000173584	0.000758445
	T4 B	92B	0.821735	24.3653	0.765846	0.00107977	0.788606	4.43902e-07	0.818727	4.68482e-07	0.000411108	0.000433871
		92L	0.76588	12.0131
		93M	0.802827	29.8539
	T4 C	93B	0.811148	23.4505	0.765846	0.00119011	0.788606	2.8937e-08	0.818727	8.09691e-07	2.43146e-05	0.000680352
		93L	0.75256	11.842
		106M	0.793679	23.7095
	T1 A	106B	0.775877	25.2938	0.779101	0.000598743	0.783482	1.10295e-06	0.802994	3.34917e-07	0.00184211	0.000559368
		106L	0.802342	12.8807
		107M	0.781493	21.4265									0.00236017	0.00309781
	T1 B	107B	0.794275	20.1465	0.779101	0.00117177	0.783482	4.13223e-06	0.802994	6.95986e-06	0.0035265	0.00593963
		107L	0.772596	11.7152
		108M	0.775273	22.9658
	T1 C	108B	0.838832	21.7106	0.779101	0.000990659	0.783482	1.69593e-06	0.802994	2.76832e-06	0.00171192	0.00279443
		108L	0.762365	12.0067
O		109M	0.772064	24.5435
	T2 A	109B	0.820507	22.8322	0.768428	0.000746771	0.782975	6.85512e-07	0.818125	1.18091e-06	0.000917969	0.00158136
C		109L	0.762283	12.6291
		110M	0.782041	23.345									0.00143546	0.00160983
T	T2 B	110B	0.830808	21.766	0.768428	0.000789649	0.782975	1.3709e-06	0.818125	2.23372e-06	0.00173608	0.00282875
		110L	0.7847	12.5312
O		111M	0.79482	23.408
	T2 C	111B	0.80306	24.9372	0.768428	0.000800026	0.782975	1.3219e-06	0.818125	3.35513e-07	0.00165232	0.000419378
B		111L	0.7583	12.5083
		112M	0.771301	24.9293
E	T3 A	112B	0.831957	24.2187	0.762394	0.000999553	0.771407	6.45071e-07	0.825471	4.67552e-07	0.000645359	0.000467761
		112L	0.761314	12.1908
R		113M	0.769487	26.07									0.000484329	0.00122791
	T3 B	113B	0.818031	21.8886	0.762394	0.000766794	0.771407	3.35996e-07	0.825471	1.9005e-06	0.000438183	0.0024785
		113L	0.766269	12.6586
		114M	0.773433	25.8304
	T3 C	114B	0.826425	23.3916	0.762394	0.00104301	0.771407	3.85336e-07	0.825471	7.69185e-07	0.000369446	0.000737467
		114L	0.75852	12.1157
		115M	0.774926	21.1967
	T4 A	115B	0.808766	21.2999	0.784674	0.00102758	0.774645	5.24403e-06	0.820609	2.86687e-06	0.00510328	0.00278992
		115L	0.792223	11.8787
		116M	0.761974	25.1609									0.00215514	0.00207576
	T4 B	116B	0.833253	23.5655	0.784674	0.00126303	0.774645	5.39681e-07	0.820609	7.37654e-07	0.000427291	0.000584036
		116L	0.76556	11.5225
		117M	0.787036	24.2263
	T4 C	117B	0.819809	21.3301	0.784674	0.00098675	0.774645	9.22479e-07	0.820609	2.81552e-06	0.000934867	0.00285333
		117L	0.796238	11.9487
		220M	0.771908	22.7767
	T1 A	220B	0.81173	22.5594	0.773484	0.0006648	0.766882	2.34109e-06	0.808766	1.56176e-06	0.0035215	0.00234922
		220L	0.79929	12.7691
		221M	0.775357	22.1007									0.00745063	0.00192711
	T1 B	221B	0.808692	23.3715	0.773484	0.000872786	0.766882	3.43985e-06	0.808766	9.6513e-07	0.00394122	0.0011058
		221L	0.769945	12.294
		222M	0.753382	19.8739
	T1 C	222B	0.805877	22.2205	0.773484	0.000820652	0.766882	1.22188e-05	0.808766	1.90908e-06	0.0148892	0.0023263
		222L	0.751218	12.4015
		223M	0.779259	22.2066
	T2 A	223B	0.822321	22.6317	0.787914	0.000707382	0.773717	2.97247e-06	0.818349	1.32757e-06	0.00420206	0.00187673
J		223L	0.75264	12.4842
		224M	0.764514	20.4435									0.00722451	0.0032447
A	T2 B	224B	0.830963	21.8138	0.787914	0.000494022	0.773717	8.16441e-06	0.818349	2.16499e-06	0.0165264	0.00438237
		224L	0.808294	13.102
N		225M	0.777377	25.4114
	T2 C	225B	0.801762	22.1776	0.787914	0.000501231	0.773717	4.73688e-07	0.818349	1.74178e-06	0.000945049	0.003475
U		225L	0.802808	13.0771
		226M	0.794372	22.5713
A	T3 A	226B	0.826323	27.9921	0.787516	0.000313819	0.789328	1.97911e-06	0.814296	5.73077e-08	0.00630654	0.000182614
		226L	0.7701	13.8883
R		227M	0.785578	24.384									0.00374363	0.00136446
	T3 B	227B	0.801947	22.1758	0.787516	0.000568962	0.789328	6.89317e-07	0.814296	1.83209e-06	0.00121153	0.00322005
Y		227L	0.822888	12.8639
		228M	0.788033	22.4806
	T3 C	228B	0.81462	24.7809	0.787516	0.000561934	0.789328	2.08636e-06	0.814296	3.8813e-07	0.00371282	0.000690703
		228L	0.769559	12.8853
		229M	0.800787	24.1883
	T4 A	229B	0.823673	23.8951	0.765755	0.000818698	0.787035	7.96764e-07	0.806556	7.28634e-07	0.000973209	0.000889991
		229L	0.76276	12.501
		230M	0.791158	23.5882									0.00202964	0.00171207
	T4 B	230B	0.785708	25.3287	0.765755	0.000499961	0.787035	1.12882e-06	0.806556	3.12089e-07	0.00225782	0.000624226
		230L	0.756827	13.3684
		231M	0.76916	22.526
	T4 C	231B	0.810287	21.7115	0.765755	0.000731834	0.787035	2.09151e-06	0.806556	2.65071e-06	0.0028579	0.003622
		231L	0.777677	12.6983
		293M	0.811734	24.0504
	T1 A	293B	0.842213	25.101	0.794666	0.000816056	0.800339	7.22134e-07	0.826553	2.70876e-07	0.000884908	0.000331933
		293L	0.778402	12.1594
		294M	0.822947	23.1074									0.00100685	0.000298814
	T1 B	294B	0.816734	24.7709	0.794666	0.000745091	0.800339	1.25726e-06	0.826553	3.30479e-07	0.00168739	0.000443542
		294L	0.81395	12.3149
		295M	0.766336	25.2993
	T1 C	295B	0.820711	26.8665	0.794666	0.000773023	0.800339	3.46502e-07	0.826553	9.35103e-08	0.000448243	0.000120967
		295L	0.791646	12.252
		296M	0.78797	22.8814
	T2 A	296B	0.834966	22.6863	0.778149	0.000615462	0.797392	1.49076e-06	0.836534	1.02528e-06	0.00242218	0.00166586
		296L	0.807261	12.8448
M		297M	0.802758	22.2077									0.00240037	0.001085
	T2 B	297B	0.84503	25.1014	0.778149	0.000717493	0.797392	2.21294e-06	0.836534	2.36187e-07	0.00308426	0.000329184
A		297L	0.76019	12.5783
		298M	0.801448	23.2942
R	T2 C	298B	0.829606	22.9563	0.778149	0.000690563	0.797392	1.17028e-06	0.836534	8.70084e-07	0.00169468	0.00125996
		298L	0.766996	12.6448
C		299M	0.789757	22.9394
	T3 A	299B	0.787521	26.3259	0.77426	0.000862303	0.801389	1.36933e-06	0.814299	1.54613e-07	0.00158799	0.000179302
H		299L	0.77764	12.3057
		300M	0.79094	24.5012									0.000948003	0.000303131
	T3 B	300B	0.824457	24.4312	0.77426	0.00085985	0.801389	5.46147e-07	0.814299	4.77993e-07	0.000635165	0.000555903
		300L	0.77509	12.3107
		301M	0.82347	24.1936
	T3 C	301B	0.83092	26.0371	0.77426	0.00105426	0.801389	6.54537e-07	0.814299	1.83641e-07	0.000620849	0.000174189
		301L	0.77005	11.9552
		302M	0.81641	22.6301
	T4 A	302B	0.84039	22.0562	0.790397	0.000839431	0.806307	1.54448e-06	0.81836	1.87261e-06	0.00183992	0.00223081
		302L	0.79752	12.1606
		303M	0.79218	22.4532									0.00200669	0.000959373
	T4 B	303B	0.813351	26.1757	0.790397	0.000577788	0.806307	1.71478e-06	0.81836	1.59473e-07	0.00296784	0.000276006
		303L	0.78039	12.8019
		304M	0.81033	23.5104
	T4 C	304B	0.80134	25.2278	0.790397	0.000757028	0.806307	9.17761e-07	0.81836	2.81091e-07	0.00121232	0.000371308
		304L	0.79328	12.338
