# Supplementary material for: Exploring interactions between Beauveria and Metarhizium strains through co-inoculation and responses of perennial ryegrass in a one-year trial
Source: PeerJ. 2022 Mar 21;10:e12924. doi: 10.7717/peerj.12924 (PMC8944343; doi:10.7717/peerj.12924)
Supplement: Supplemental Information 7 [file peerj-10-12924-s007.xlsx]

## Sheet: Hoja1
			1° Aboveground biomass (july 24)						2° Aboveground biomass (september 12)						3° Aboveground biomass (october 21)						4° Aboveground biomass (november 25)						5° Aboveground biomass (december 26)						6° Aboveground biomass (january 25)						7° Aboveground biomass (february 17)						8° Aboveground biomass (march 16)
Treatment	Mini-pastures		Fresh weight (g)	Average	Dry weight (g)	Average	Leaf area (cm2)	Average	Fresh weight (g)	Average	Dry weight (g)	Average	Leaf area (cm2)	Average	Fresh weight (g)	Average	Dry weight (g)	Average	Leaf area (cm2)	Average	Fresh weight (g)	Average	Dry weight (g)	Average	Leaf area (cm2)	Average	Fresh weight (g)	Average	Dry weight (g)	Average	Leaf area (cm2)	Average	Fresh weight (g)	Average	Dry weight (g)	Average	Leaf area (cm2)	Average	Fresh weight (g)	Average	Dry weight (g)	Average	Leaf area (cm2)	Average	Fresh weight (g)	Average	Dry weight (g)	Average	Leaf area (cm2)
		A	47		4.3		265.36		241.3		14		309.654		529.2		89.4		240.493		537.9		102.2		201.557		279.4		51.6		262.218		161.1		28		276.308		233		31.4		292.861		175.9		25.5		288.078
I	T1	B	33.5	37.3667	5.5	4.96667	292.553	284.772	213.9	282.8	13.5	12.9	286.533	279.558	479.5	564.4	75.9	92.5667	224.435	227.825	487.1	486.333	88.5	88.4	222.038	227.939	253.2	278.033	45.9	49.1667	267.257	265.572	204.3	202.367	32.8	32.5333	269.332	269.283	287.4	263.933	38.2	35.2333	251.231	267.83	216.8	195.4	32.1	29.3333	286.837
N		C	31.6		5.1		296.404		393.2		11.2		242.487		684.5		112.4		218.548		434		74.5		260.222		301.5		50		267.241		241.7		36.8		262.21		271.4		36.1		259.399		193.5		30.4		240.486
O		A	27.4		4.6		300.234		150.2		16		251.784		453.1		73.5		250.73		511.9		95.9		186.158		289		49		266.321		150		24.7		276.577		341.2		44.6		262.696		259.9		34.5		266.234
C	T2	B	49.7	36.7	5.8	5.23333	276.51	286.516	244.8	206.133	13	14.3333	321.138	285.337	494.5	468.267	80.2	81.4667	258.739	249.218	471.8	470.233	89.6	89.9667	201.292	210.33	265.4	268	47.9	48.5	248.482	256.751	150.3	152.5	27.2	27.1	283.356	279.063	272.3	314.633	37.9	42.8667	252.147	260.665	218.7	257.567	33	38.3667	259.34
U		C	33		5.3		282.805		223.4		14		283.089		457.2		90.7		238.185		427		84.4		243.541		249.6		48.6		255.451		157.2		29.4		277.257		330.4		46.1		267.151		294.1		47.6		252.566
L		A	38.6		6.1		283.453		214.2		14.6		251.944		479.1		82.4		239.792		503.7		91.1		215.337		284.7		50.6		240.521		191.9		31.4		329.38		247.7		34		278.157		208		29.1		291.175
A	T3	B	34.2	35.7333	5.9	5.26667	300.042	297.353	165.8	203.267	14.1	14.2667	283.307	265.069	428.8	483.9	66	83.5333	203.463	221.024	542.1	515.233	100.9	96.1667	173.993	206.704	279.6	269.333	48	49.5	252.62	240.237	199.2	195.833	31.7	32.4333	271.288	289.684	261	248	36.2	34.3333	293.915	287.088	187.4	182.767	28.8	27.3333	271.185
T		C	34.4		3.8		308.564		229.8		14.1		259.956		543.8		102.2		219.817		499.9		96.5		230.783		243.7		49.9		227.571		196.4		34.2		268.385		235.3		32.8		289.193		152.9		24.1		281.622
E		A	44		6.7		288.907		255.7		13.8		296.735		519.7		87.5		241.321		545.2		106.2		193.461		262.1		48.7		237.601		133.3		24.4		300.442		262.4		35.7		267.132		288		39.4		252.621
D	T4	B	42.5	40.7	6.7	6.43333	273.265	281.003	353.8	287.167	12.5	13.3667	231.131	274.867	605.2	536.1	76.1	87.0333	220.955	230.313	431.5	482.867	62.9	87.9333	247.83	236.977	369.8	293.233	57.9	52.5667	233.066	251.977	306.1	186.033	46.2	31.1333	232.575	270.676	305.5	320.7	39.6	42.9333	249.911	260.69	186.6	256.867	25	36.9	289.169
		C	35.6		5.9		280.836		252		13.8		296.735		483.4		97.5		228.664		471.9		94.7		269.64		247.8		51.1		285.264		118.7		22.8		279.011		394.2		53.5		265.027		296		46.3		286.527
		A	35.3		5.7		291.811		181.7		15		340.067		429.9		71.3		243.007		523.1		93.6		209.832		254.6		49		218.224		219		35.9		278.045		270.1		37.7		275.933		203.1		29.1		258.314
	T5	B	34.6	32	3.3	4.46667	305.198	304.255	205.4	185.533	14.4	14.7	257	282.522	529.1	462.6	79.8	75.9	242.633	227.73	483.6	496.833	87.3	92.6667	259.142	235.824	295.2	271.333	49.4	49.9	272.09	247.448	203.8	208.533	36.1	36.5	261.264	266.355	261.2	280.133	36.4	39.0333	278.204	278.163	228.5	214.2	32.8	31.6	265.362
C		C	26.1		4.4		315.756		169.5		14.7		250.5		428.8		76.6		197.551		483.8		97.1		238.498		264.2		51.3		252.031		202.8		37.5		259.756		309.1		43		280.352		211		32.9		289.302
O		A	27.3		4.7		295.786		144.1		15.4		287.277		430.3		62.7		253.953		532.7		94.1		249.446		292		51.1		251.211		149.2		27		268.947		369.6		51.5		257.674		287.3		39.1		275.756
N	T6	B	35.2	29.7	5.7	4.96667	298.527	296.043	195.6	181.567	14.1	14.7667	230.003	258.521	425.1	428.533	77.5	72.1333	246.747	240.405	534.1	487.533	99.3	90.8667	236.019	232.895	273.2	273.8	49.9	50.9	254.036	252.721	127.9	148.167	22.9	27.7	314.125	287.89	361.3	358.567	47.9	50.1667	253.912	261.182	260.1	279.133	38.3	41.2	276.767
T		C	26.6		4.5		293.816		205		14.8		258.282		430.2		76.2		220.515		395.8		79.2		213.221		256.2		51.7		252.915		167.4		33.2		280.598		344.8		51.1		271.96		290		46.2		272.841
R		A	39		6		289.285		366.1		11.1		237.363		595.4		74.7		229.975		530		82.2		149.064		362.8		55		247.855		364.1		53.6		272.507		187.8		25.7		291.138		190.3		25.3		266.686
O	T7	B	33.4	32.1333	5.5	5.2	283.494	287.53	212.8	267.467	14.4	13.3667	232.344	296.15	459	501.567	73.5	76.4333	243.083	226.801	525.4	492.767	98.1	88.5	220.296	181.987	244.2	293.4	42.9	50.2	285.196	267.915	182.1	248.333	31.1	40.6667	268.178	270.294	206.8	238.067	28.1	32.8667	263.179	275.851	142.7	178.033	20.9	25.3333	299.727
L		C	24		4.1		289.81		223.5		14.6		418.744		450.3		81.1		207.345		422.9		85.2		176.6		273.2		52.7		270.695		198.8		37.3		270.198		319.6		44.8		273.237		201.1		29.8		285.531
		A	33.7		3.5		343.796		199.1		13.8		318.76		429.1		66.7		238.635		529.8		90.2		253.563		303.1		52.1		279.188		129.9		23.6		269.994		302.5		42.1		243.85		241.3		35.3		273.125
	T8	B	24.3	31	4.3	4.5	319.911	318.118	120.9	190.367	15.7	14.5	303.57	303.467	478.5	463.267	71.6	74.7	236.412	240.819	546.4	535.167	100.3	99.5667	195.411	214.094	266.9	270.633	46.7	48.9667	275.146	265.206	121.3	125.967	23.8	24.9333	302.154	292.724	242.7	315.467	46.6	48.1	254.354	254.478	172	252.433	24.9	36.8	289.356
		C	35		5.7		290.647		251.1		14		288.072		482.2		85.8		247.411		529.3		108.2		193.308		241.9		48.1		241.283		126.7		27.4		306.024		401.2		55.6		265.231		344		50.2		276.761
[truncated: 2 more columns]
